# Supplementary material
Source: ML conference proceedings conference paper supplement (https://proceedings.neurips.cc/paper_files/paper/2022/hash/2d2f85c0f93e69cf71f58eebaebb5e8d-Abstract.html)
Supplement: Supplementary file 1 [file 2d2f85c0f93e69cf71f58eebaebb5e8d-Supplemental-Conference.zip]

Archive with 2 entries (2 files):
- appendix.pdf
- __MACOSX/._appendix.pdf
